# Supplementary material for: Cross‐Gramian‐Based Combined State and Parameter Reduction for Large‐Scale Control Systems
Source: Hindawi journal article supplement (doi:10.1155/2014/843869), 2014-01-01
Supplement: f1 [file 843869.f1.zip]

Archive with 4 entries (4 files):
- README.txt
- emgr.m
- mpe.m
- mpe_plots.m
