# Supplementary material for: Cross‐Gramian‐Based Combined State and Parameter Reduction for Large‐Scale Control Systems
Source: Hindawi journal article supplement (doi:10.1155/2014/843869), 2014-01-01
Supplement: f1 [file 843869.f1.zip › README.txt]

Cross-Gramian-Based Combined State and Parameter Reduction for Large-Scale Control Systems (Companion Code)
===========================================================================================================

## Compatibility: 

compatible to Matlab and Octave

## Usage:

`mpe()`     % compute and save results

`mpe_plots` % load and plot results 

## Framework:

uses the **emgr** framework for computing empirical gramians from [http://gramian.de](http://gramian.de).

## License:

Copyright (c) 2014 Christian Himpe,

All rights reserved.

Redistribution and use in source and binary forms, with or without modification,
are permitted provided that the following conditions are met:

1. Redistributions of source code must retain the above copyright notice,
   this list of conditions and the following disclaimer.
2. Redistributions in binary form must reproduce the above copyright notice,
   this list of conditions and the following disclaimer in the documentation
   and/or other materials provided with the distribution.

THIS SOFTWARE IS PROVIDED BY THE COPYRIGHT HOLDERS AND CONTRIBUTORS "AS IS" AND
ANY EXPRESS OR IMPLIED WARRANTIES, INCLUDING, BUT NOT LIMITED TO, THE IMPLIED
WARRANTIES OF MERCHANTABILITY AND FITNESS FOR A PARTICULAR PURPOSE ARE DISCLAIMED.
IN NO EVENT SHALL THE COPYRIGHT OWNER OR CONTRIBUTORS BE LIABLE FOR ANY DIRECT,
INDIRECT, INCIDENTAL, SPECIAL, EXEMPLARY, OR CONSEQUENTIAL DAMAGES (INCLUDING, BUT
NOT LIMITED TO, PROCUREMENT OF SUBSTITUTE GOODS OR SERVICES; LOSS OF USE, DATA, OR
PROFITS; OR BUSINESS INTERRUPTION) HOWEVER CAUSED AND ON ANY THEORY OF LIABILITY,
WHETHER IN CONTRACT, STRICT LIABILITY, OR TORT (INCLUDING NEGLIGENCE OR OTHERWISE)
ARISING IN ANY WAY OUT OF THE USE OF THIS SOFTWARE, EVEN IF ADVISED OF THE POSSIBILITY
OF SUCH DAMAGE.
